# Supplementary material for: Applying1H NMR Spectroscopy to Detect Changes in the Urinary Metabolite Levels of Chinese Half-Pipe Snowboarders after Different Exercises
Source: Hindawi journal article supplement (doi:10.1155/2015/315217), 2015-01-01
Supplement: f1 [file 315217.f1.pdf]

**Applying  $^1\text{H}$  NMR Spectroscopy to detect Changes in the Urinary Metabolite  
Levels of Chinese Halfpipe Snowboarders after Different Exercises**

Fuqiu Wang,<sup>1</sup> Jiao Han,<sup>2</sup> Qing He,<sup>3</sup> Zhufeng Geng,<sup>2</sup> Zhiwei Deng,<sup>2</sup> and Decai Qiao<sup>1</sup>

<sup>1</sup>*College of P.E and Sports, Beijing Normal University, No.19 Xijiekouwai Street,  
Haidian District, Beijing 100875, China*

<sup>2</sup>*Center of Analysis and Test, Beijing Normal University, No.19 Xijiekouwai Street,  
Haidian District, Beijing 100875, China*

<sup>3</sup>*School of Chemical Engineering and Technology, Tianjin University, 92 Weijin  
Road, Nankai District, Tianjin 300072, China*

\* Corresponding authors: Decai Qiao, E-Mail: [decai@bnu.edu.cn](mailto:decai@bnu.edu.cn), Tel.:  
+86-10-5880-2227, Fax: +86-10-5880-2227 and Zhiwei Deng, E-Mail:  
[dengzw@bnu.edu.cn](mailto:dengzw@bnu.edu.cn), Tel.: +86-10-5880-6866; Fax: +86-10-5880-0076.

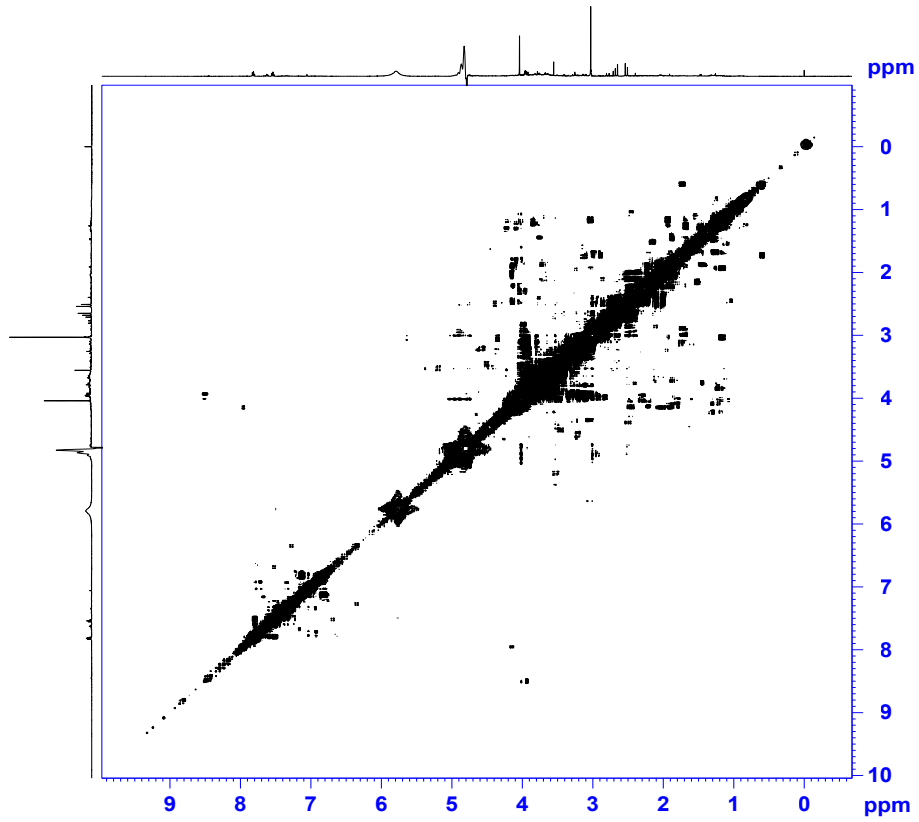

Figure 1S COSY NMR spectrum for typical urine sample.

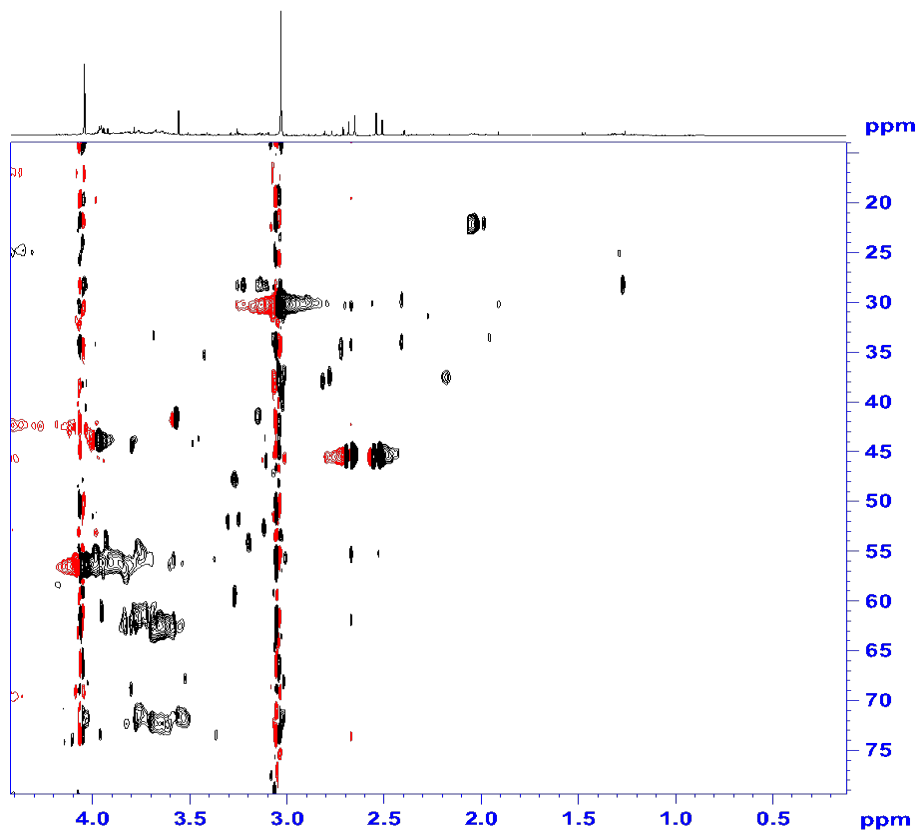

Figure 2S HSQC NMR spectrum for typical urine sample (Part I)

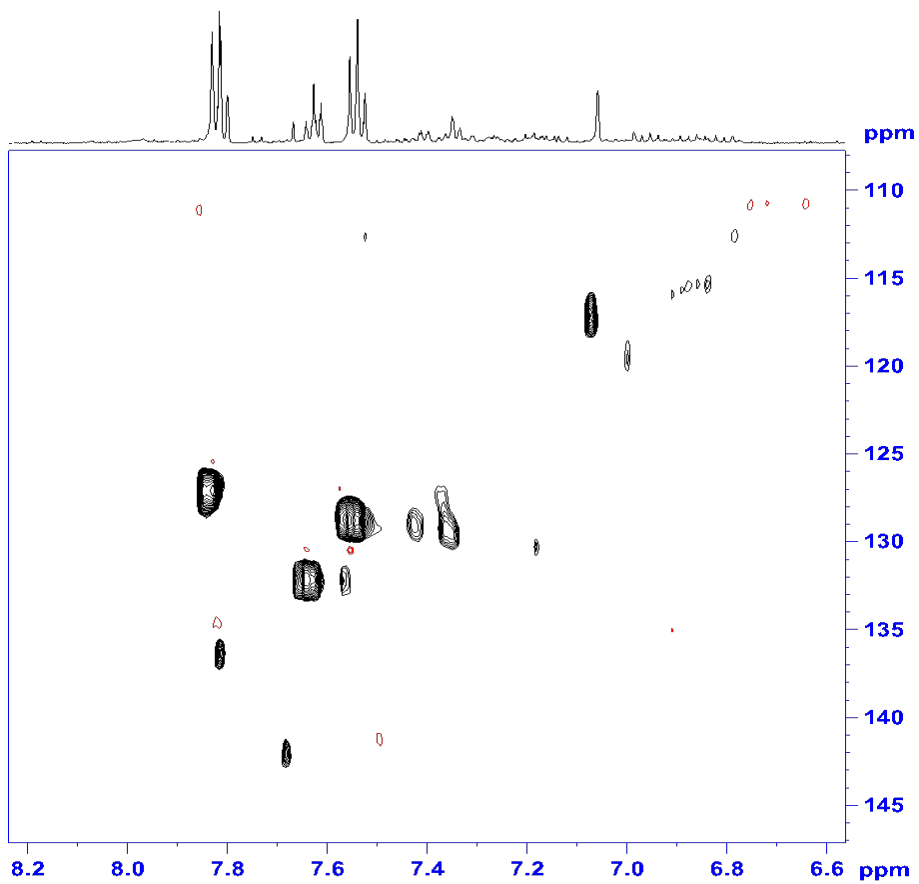

Figure 3S HSQC NMR spectrum for typical urine sample (Part II)
